# Supplementary material
Source: PubMed Central journal article supplement (PMC6980354)
Supplement: NIHMS1525064-supplement-1.pdf [file NIHMS1525064-supplement-1.pdf]

# **Nanoparticle-mediated Impact on Growth and Fatty Acid Methyl Ester Composition in the Cyanobacterium *Fremyella diplosiphon***

Behnam Tabatabai<sup>1</sup>, Somayeh Gharaie Fathabad<sup>1</sup>, Enock Bonyi<sup>2</sup>, Sophia Rajini<sup>3</sup>, Kadir Aslan<sup>2</sup>, and Viji Sitther<sup>1</sup>

<sup>1</sup>Department of Biology, Morgan State University, 1700 East Cold Spring Lane, Baltimore, Maryland 21251, United States

<sup>2</sup>Department of Civil Engineering, Morgan State University, 1700 East Cold Spring Lane, Baltimore, Maryland 21251, United States

<sup>3</sup>Middle East Educational Services, Doha, Qatar, P.O. BOX: 3453

\*Corresponding Author.

\* *Email address:* [viji.sitther@morgan.edu](mailto:viji.sitther@morgan.edu) (V. Sitther)

|                 |       |       |              |
|-----------------|-------|-------|--------------|
| 200NP vs 200NP- | 48.79 | 0.001 | * $p < 0.05$ |
|-----------------|-------|-------|--------------|

**Online Resource 1** Tukey Honest Significant Difference post-hoc test values for growth rates comparisons (calculated via least squares fitting methods) of **(a)** wild type (Fd33) and **(b)** halotolerant (HSF33-2) strains in solution with 20, 100, or 200 nm-diameter gold nanoparticles (NPs) over a period of 9 (Fd33) or 11 (HSF33-2) days. Cells grown in absence of AuNPs served as control (C) and gold colloids alone were denoted as AuNP only (NP-).

(a)

| Treatment pairs | Q-statistic | p-value | Inference     |
|-----------------|-------------|---------|---------------|
| C vs 20NP       | 0.11        | 0.900   | insignificant |
| C vs 100NP      | 0.25        | 0.900   | insignificant |
| C vs 200NP      | 5.48        | 0.022   | * $p < 0.05$  |
| C vs 20NP-      | 35.16       | 0.001   | * $p < 0.05$  |
| C vs 100NP-     | 40.48       | 0.001   | * $p < 0.05$  |
| C vs 200NP-     | 43.31       | 0.001   | * $p < 0.05$  |
| 20NP vs 100NP   | 0.37        | 0.900   | insignificant |
| 20NP vs 200NP   | 5.37        | 0.025   | * $p < 0.05$  |
| 20NP vs 20NP-   | 35.28       | 0.001   | * $p < 0.05$  |
| 20NP vs 100NP-  | 40.59       | 0.001   | * $p < 0.05$  |
| 20NP vs 200NP-  | 43.43       | 0.001   | * $p < 0.05$  |
| 100NP vs 200NP  | 5.73        | 0.016   | * $p < 0.05$  |
| 100NP vs 20NP-  | 34.91       | 0.001   | * $p < 0.05$  |
| 100NP vs 100NP- | 40.23       | 0.001   | * $p < 0.05$  |
| 100NP vs 200NP- | 43.06       | 0.001   | * $p < 0.05$  |
| 200NP vs 20NP-  | 40.64       | 0.001   | * $p < 0.05$  |
| 200NP vs 100NP- | 45.96       | 0.001   | * $p < 0.05$  |

(b)

| Treatment pairs | Q-statistic | p-value | Inference     |
|-----------------|-------------|---------|---------------|
| C vs 20NP       | 0.43        | 0.900   | insignificant |
| C vs 100NP      | 3.84        | 0.166   | insignificant |
| C vs 200NP      | 4.84        | 0.049   | * $p < 0.05$  |
| C vs 20NP-      | 16.03       | 0.001   | * $p < 0.05$  |
| C vs 100NP-     | 20.92       | 0.001   | * $p < 0.05$  |
| C vs 200NP-     | 23.53       | 0.001   | * $p < 0.05$  |
| 20NP vs 100NP   | 4.27        | 0.100   | insignificant |
| 20NP vs 200NP   | 5.27        | 0.029   | * $p < 0.05$  |
| 20NP vs 20NP-   | 15.60       | 0.001   | * $p < 0.05$  |

|                  |       |       |               |
|------------------|-------|-------|---------------|
| 20NP vs 100NP-   | 20.49 | 0.001 | * $p<0.05$    |
| 20NP vs 200NP-   | 23.10 | 0.001 | * $p<0.05$    |
| 100NP vs 200NP   | 1.00  | 0.900 | insignificant |
| 100NP vs 20NP-   | 19.86 | 0.001 | * $p<0.05$    |
| 100NP vs 100NP-  | 24.76 | 0.001 | * $p<0.05$    |
| 100NP vs 200NP-  | 27.37 | 0.001 | * $p<0.05$    |
| 200NP vs 20NP-   | 20.87 | 0.001 | * $p<0.05$    |
| 200NP vs 100NP-  | 25.76 | 0.001 | * $p<0.05$    |
| 200NP vs 200NP-  | 28.37 | 0.001 | * $p<0.05$    |
| 20NP- vs 100NP-  | 4.89  | 0.046 | * $p<0.05$    |
| 20NP- vs 200NP-  | 7.50  | 0.002 | * $p<0.05$    |
| 100NP- vs 200NP- | 2.61  | 0.539 | insignificant |

**Online Resource 2** Specific growth rates ( $\mu$ ) of *Fremyella diplosiphon* (a) wild type (Fd33) and (b) halotolerant (HSF33-2) in solution with 20, 100, or 200 nm-diameter gold nanoparticles (NPs) over a period of 9 (Fd33) or 11 (HSF33-2) days. Cells grown in absence of AuNPs served as control (C) and gold colloids alone were denoted as AuNP only (NP-). Bars represent average growth rates ( $\pm$  standard error) for three biological replicates of each treatment. Different letters above bars indicate significance among treatment means at each time point ( $p < 0.05$ ).

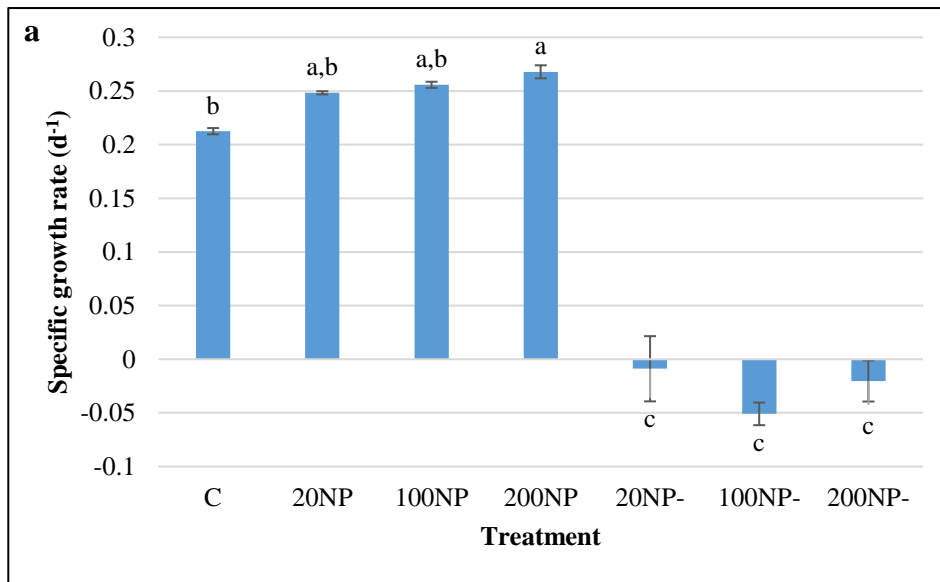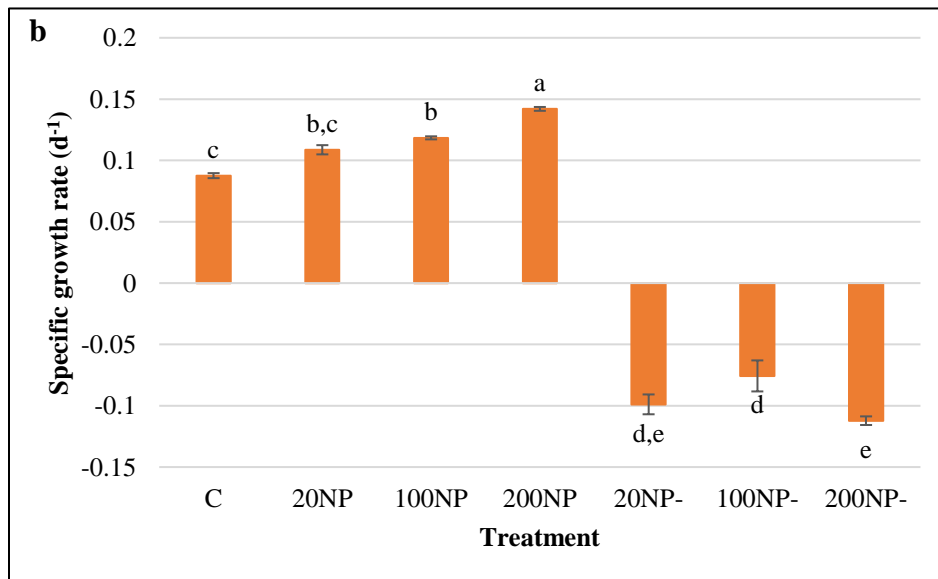

**Online Resource 3** Partitioning of variance for comparison of specific growth rate ( $\mu$ ) in *Fremyella diplosiphon* (a) wild type (Fd33) and (b) halotolerant (HSF33-2) strains using one-way class I analysis of variance.

(a)

| Source    | Sum of squares (SS) | Degrees of freedom (vv) | Mean square (MS) | F-statistic | <i>p</i> -value |
|-----------|---------------------|-------------------------|------------------|-------------|-----------------|
| Treatment | 0.227               | 6                       | 0.0378           | 141.6449    | 1.03E-11        |
| Error     | 0.0037              | 14                      | 0.0003           |             |                 |
| Total     | 0.2307              | 20                      |                  |             |                 |

(b)

| Source    | Sum of squares (SS) | Degrees of freedom (vv) | Mean square (MS) | F-statistic | <i>p</i> -value |
|-----------|---------------------|-------------------------|------------------|-------------|-----------------|
| Treatment | 0.2296              | 6                       | 0.0383           | 385.6742    | 1.01E-14        |
| Error     | 0.0014              | 14                      | 0.0001           |             |                 |
| Total     | 0.231               | 20                      |                  |             |                 |

**Online Resource 4** Tukey Honest Significant Difference post-hoc test values for specific growth rate ( $\mu$ ) comparisons of (a) wild type (Fd33) and (b) halotolerant (HSF33-2) strains in solution with 20, 100, or 200 nm-diameter gold nanoparticles (NPs) over a period of 9 (Fd33) or 11 (HSF33-2) days. Cells grown in absence of AuNPs served as control (C) and gold colloids alone were denoted as AuNP only (NP-).

(a)

| Treatment pairs  | Q-statistic | p-value  | Inference     |
|------------------|-------------|----------|---------------|
| C vs 20NP        | 3.791       | 0.174412 | insignificant |
| C vs 100NP       | 4.581       | 0.068266 | * $p < 0.05$  |
| C vs 200NP       | 5.8654      | 0.013275 | * $p < 0.05$  |
| C vs 20NP-       | 18.7292     | 0.001005 | * $p < 0.05$  |
| C vs 100NP-      | 17.1341     | 0.001005 | * $p < 0.05$  |
| C vs 200NP-      | 19.3938     | 0.001005 | * $p < 0.05$  |
| 20NP vs 100NP    | 0.79        | 0.899995 | insignificant |
| 20NP vs 200NP    | 2.0744      | 0.73591  | insignificant |
| 20NP vs 20NP-    | 22.5203     | 0.001005 | * $p < 0.05$  |
| 20NP vs 100NP-   | 20.9251     | 0.001005 | * $p < 0.05$  |
| 20NP vs 200NP-   | 23.1849     | 0.001005 | * $p < 0.05$  |
| 100NP vs 200NP   | 1.2844      | 0.899995 | insignificant |
| 100NP vs 20NP-   | 23.3103     | 0.001005 | * $p < 0.05$  |
| 100NP vs 100NP-  | 21.7151     | 0.001005 | * $p < 0.05$  |
| 100NP vs 200NP-  | 23.9749     | 0.001005 | * $p < 0.05$  |
| 200NP vs 20NP-   | 24.5947     | 0.001005 | * $p < 0.05$  |
| 200NP vs 100NP-  | 22.9995     | 0.001005 | * $p < 0.05$  |
| 200NP vs 200NP-  | 25.2593     | 0.001005 | * $p < 0.05$  |
| 20NP- vs 100NP-  | 1.5952      | 0.899995 | insignificant |
| 20NP- vs 200NP-  | 0.6646      | 0.899995 | insignificant |
| 100NP- vs 200NP- | 2.2598      | 0.667432 | insignificant |

(b)

| Treatment pairs  | Q-statistic | p-value  | Inference     |
|------------------|-------------|----------|---------------|
| C vs 20NP        | 3.6661      | 0.200162 | insignificant |
| C vs 100NP       | 5.3571      | 0.025553 | * $p < 0.05$  |
| C vs 200NP       | 9.4627      | 0.001005 | * $p < 0.05$  |
| C vs 20NP-       | 31.6325     | 0.001005 | * $p < 0.05$  |
| C vs 100NP-      | 28.3925     | 0.001005 | * $p < 0.05$  |
| C vs 200NP-      | 34.7392     | 0.001005 | * $p < 0.05$  |
| 20NP vs 100NP    | 1.691       | 0.877545 | insignificant |
| 20NP vs 200NP    | 5.7966      | 0.014508 | * $p < 0.05$  |
| 20NP vs 20NP-    | 35.2986     | 0.001005 | * $p < 0.05$  |
| 20NP vs 100NP-   | 32.0586     | 0.001005 | * $p < 0.05$  |
| 20NP vs 200NP-   | 38.4053     | 0.001005 | * $p < 0.05$  |
| 100NP vs 200NP   | 5.1056      | 0.04146  | * $p < 0.05$  |
| 100NP vs 20NP-   | 36.9896     | 0.001005 | * $p < 0.05$  |
| 100NP vs 100NP-  | 33.7496     | 0.001005 | * $p < 0.05$  |
| 100NP vs 200NP-  | 40.0963     | 0.001005 | * $p < 0.05$  |
| 200NP vs 20NP-   | 41.0952     | 0.001005 | * $p < 0.05$  |
| 200NP vs 100NP-  | 37.8552     | 0.001005 | * $p < 0.05$  |
| 200NP vs 200NP-  | 44.2019     | 0.001005 | * $p < 0.05$  |
| 20NP- vs 100NP-  | 3.24        | 0.312324 | insignificant |
| 20NP- vs 200NP-  | 3.1067      | 0.35569  | insignificant |
| 100NP- vs 200NP- | 6.3467      | 0.007146 | * $p < 0.05$  |
